# Supplementary material for: Extracting Intercellular Signaling Network of Cancer Tissues using Ligand-Receptor Expression Patterns from Whole-tumor and Single-cell Transcriptomes
Source: PubMed Central journal article supplement (PMC5562796; doi:10.1038/s41598-017-09307-w), 2017-08-18
Supplement: 41598_2017_9307_MOESM1_ESM.pdf [file 41598_2017_9307_MOESM1_ESM.pdf]

# Extracting Intercellular Signaling Network of Cancer Tissues using Ligand-Receptor Expression Patterns from Whole-tumor and Single-cell Transcriptomes

Joseph X. Zhou<sup>1§</sup>, Roberto Taramelli<sup>2§</sup>, Edoardo Pedrini<sup>2</sup>, Theo Knijnenburg<sup>1</sup>, Sui Huang<sup>1\*</sup>

## Affiliations:

<sup>1</sup> Institute for Systems Biology, Seattle WA, USA.

<sup>2</sup> Department of Biotechnology and Molecular Science, University of Insubria, Varese, Italy

§ authors contributed equally as first author

\*Correspondence to: [sui.huang@systemsbiology.org](mailto:sui.huang@systemsbiology.org)

## Supplementary

Distribution of correlation coefficients of the random ligand-receptor pairs

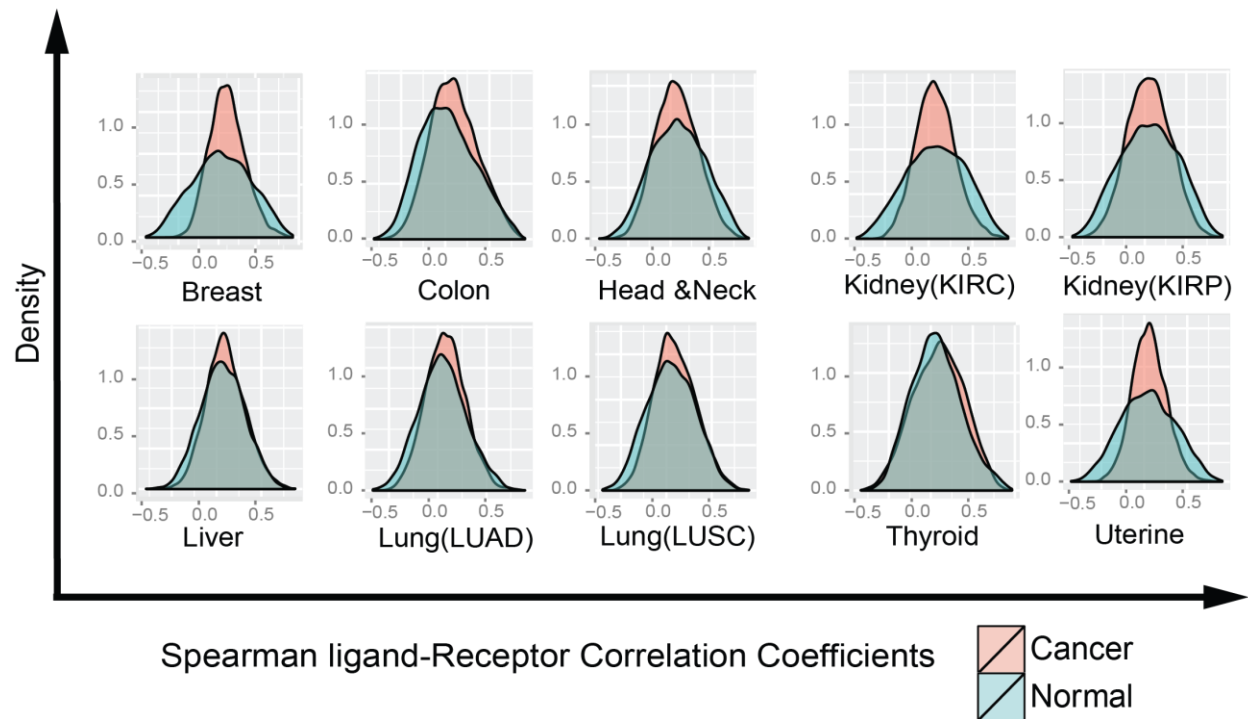

**Figure S1.** The distribution of correlation coefficients of the random ligand-receptor pairs for the samples of ten cancer types and their corresponding normal tissues. The random receptor/ ligand pairs were less correlated than the specific pairs at the population level for ten cancer types (see Fig. 4A).

| No. | ligand  | receptor | Shared cancer types number |
|-----|---------|----------|----------------------------|
| 1   | COL11A1 | ITGA2    | 5                          |
| 2   | COL7A1  | ITGA2    | 5                          |
| 3   | MDK     | GPC2     | 5                          |
| 4   | MMP1    | ITGA2    | 5                          |
| 5   | COL1A1  | ITGA11   | 4                          |
| 6   | COL1A1  | ITGA2    | 4                          |
| 7   | CXCL5   | CXCR2P1  | 4                          |
| 8   | FN1     | PLAUR    | 4                          |
| 9   | JAG2    | NOTCH3   | 4                          |
| 10  | MMP9    | EPHB2    | 4                          |
| 11  | COL1A1  | CD44     | 3                          |
| 12  | COL1A1  | TMPRSS6  | 3                          |
| 13  | COL4A1  | ITGA2    | 3                          |
| 14  | EFNA3   | EPHA1    | 3                          |
| 15  | EFNA4   | EPHA1    | 3                          |

Table S1. The top 15 ligand-receptor pairs both are significantly up-regulated in cancer tissues (LIMMA, two folds change, P-value=0.05)

| No. | Ligand  | Receptor | Ligand Change | Receptor Change | Shared cancer types number |
|-----|---------|----------|---------------|-----------------|----------------------------|
| 1   | CALM1   | HMMR     | 0             | 1               | 9                          |
| 2   | SPP1    | ITGAV    | 1             | 0               | 9                          |
| 3   | SPP1    | ITGB1    | 1             | 0               | 9                          |
| 4   | TNFSF18 | TNFRSF18 | 0             | 1               | 9                          |
| 5   | COL11A1 | ITGB1    | 1             | 0               | 8                          |
| 6   | CTHRC1  | FZD6     | 1             | 0               | 8                          |
| 7   | EFNA3   | EPHA5    | 1             | 0               | 8                          |
| 8   | HSPA1A  | GRIN2D   | 0             | 1               | 8                          |
| 9   | SPP1    | ITGA5    | 1             | 0               | 8                          |
| 10  | ADAM12  | ITGB1    | 1             | 0               | 7                          |
| 11  | ASIP    | MC1R     | 0             | 1               | 7                          |
| 12  | COL11A1 | DDR1     | 1             | 0               | 7                          |
| 13  | COL1A1  | ITGAV    | 1             | 0               | 7                          |
| 14  | COL1A1  | ITGB1    | 1             | 0               | 7                          |
| 15  | COL5A1  | ITGB1    | 1             | 0               | 7                          |

Table S2. The top 15 ligand-receptor pairs in which only one of them is significantly up-regulated in cancer tissues (LIMMA, 1 means the gene has two folds up change with P-value =0.05, 0 means the gene unchanged)

| No. | ligand  | receptor | Shared cancer types |
|-----|---------|----------|---------------------|
| 1   | ANGPTL1 | TEK      | 8                   |
| 2   | CCL21   | CCBP2    | 7                   |
| 3   | ANGPT1  | TEK      | 6                   |
| 4   | CCL14   | CCBP2    | 6                   |
| 5   | L1CAM   | CNTN1    | 6                   |
| 6   | NCAM1   | GFRA1    | 6                   |
| 7   | ANGPT1  | TIE1     | 5                   |
| 8   | APOD    | LEPR     | 5                   |
| 9   | BST1    | CAV1     | 5                   |
| 10  | CD34    | SELP     | 5                   |
| 11  | CTGF    | ERBB4    | 5                   |
| 12  | DCN     | ERBB4    | 5                   |
| 13  | FGF7    | FGFR2    | 5                   |
| 14  | L1CAM   | FGFR2    | 5                   |
| 15  | LPL     | GPIHBP1  | 5                   |

Table S3. The top 15 ligand-receptor pairs both are significantly down-regulated in cancer tissues (LIMMA, two folds change, P-value =0.05)

| No. | Ligand | Receptor | Ligand Change | Receptor Change | Shared cancer types number |
|-----|--------|----------|---------------|-----------------|----------------------------|
| 1   | CLCF1  | CNTRF    | 0             | -1              | 9                          |
| 2   | CNTF   | LIFR     | 0             | -1              | 9                          |
| 3   | CORT   | SSTR1    | 0             | -1              | 9                          |
| 4   | CXCL12 | CXCR4    | -1            | 0               | 9                          |
| 5   | NPY    | NPY1R    | 0             | -1              | 9                          |
| 6   | RELN   | ITGB1    | -1            | 0               | 9                          |
| 7   | RSPO3  | FZD8     | -1            | 0               | 9                          |
| 8   | TGFB3  | TGFBR3   | 0             | -1              | 9                          |
| 10  | ANGPT4 | TEK      | 0             | -1              | 8                          |
| 11  | CCL21  | CXCR3    | -1            | 0               | 8                          |
| 14  | CXCL12 | CXCR3    | -1            | 0               | 8                          |
| 16  | GH1    | GHR      | 0             | -1              | 8                          |
| 17  | GH2    | GHR      | 0             | -1              | 8                          |
| 18  | HK1    | TACR1    | 0             | -1              | 8                          |
| 20  | IGF1   | IGF1R    | -1            | 0               | 8                          |
| 21  | LAMA2  | ITGB1    | -1            | 0               | 8                          |
| 22  | NCAM1  | PTPRA    | -1            | 0               | 8                          |
| 23  | PTN    | CDH10    | -1            | 0               | 8                          |
| 24  | UBA52  | AGTR1    | 0             | -1              | 8                          |
| 27  | CALM1  | VIPR1    | 0             | -1              | 7                          |
| 28  | CALM3  | PDE1A    | 0             | -1              | 7                          |
| 29  | CCL14  | CCR1     | -1            | 0               | 7                          |
| 30  | CCL14  | CCR3     | -1            | 0               | 7                          |
| 31  | CCL14  | CCR5     | -1            | 0               | 7                          |
| 32  | CCL25  | CCBP2    | 0             | -1              | 7                          |
| 33  | CCL27  | CCBP2    | 0             | -1              | 7                          |
| 34  | CCL3L3 | CCBP2    | 0             | -1              | 7                          |
| 35  | CCL7   | CCBP2    | 0             | -1              | 7                          |
| 36  | CNTF   | IL6ST    | 0             | -1              | 7                          |

|    |        |       |    |   |   |
|----|--------|-------|----|---|---|
| 38 | COL4A4 | ITGAV | -1 | 0 | 7 |
| 39 | COL4A4 | ITGB1 | -1 | 0 | 7 |
| 40 | COL4A6 | CD47  | -1 | 0 | 7 |
| 41 | COL4A6 | ITGAV | -1 | 0 | 7 |
| 42 | COL4A6 | ITGB1 | -1 | 0 | 7 |
| 45 | CXCL12 | CCR4  | -1 | 0 | 7 |

Table S4. The top 45 ligand-receptor pairs in which only one of them is significantly down-regulated in cancer tissues (LIMMA, -1 means the gene has two folds down change with P-value =0.05, 0 means the gene unchanged)

| No. | Code | Full Name                             | Distance | P-value  |
|-----|------|---------------------------------------|----------|----------|
| 1   | BRCA | Breast Carcinoma                      | 0.18     | 0        |
| 2   | COAD | Colon adenocarcinoma                  | 0.17     | 0        |
| 3   | HNSC | Head & Neck squamous cell carcinoma   | 0.10     | 1.24E-08 |
| 4   | KIRC | Kidney renal clear cell carcinoma     | 0.14     | 3.77E-15 |
| 5   | KIRP | Kidney renal papillary cell carcinoma | 0.14     | 1.72E-14 |
| 6   | LIHC | Liver hepatocellular carcinoma        | 0.08     | 2.65E-05 |
| 7   | LUAD | Lung adenocarcinoma                   | 0.09     | 1.94E-06 |
| 8   | LUSC | Lung squamous cell carcinoma          | 0.11     | 2.11E-09 |
| 9   | THCA | Thyroid carcinoma                     | 0.03     | 0.24     |
| 10  | UCEC | Uterine Corpus Endometrial Carcinoma  | 0.16     | 0        |

Table S5. *Kolmogrov-Sminov* test of *Spearman* correlation distribution between normal and cancer tissues. The distances and P-values of *Spearman* correlation coefficients distribution between 10 normal and cancer tissues from TCGA were calculated from *Kolmogrov-Sminov* tests. The P-value of 0.01 is set as the cut-off for the significant change of two distributions.

| No. | ligand        | receptor      | Shared cancer types |
|-----|---------------|---------------|---------------------|
| 1   | <i>CCL2</i>   | <i>CCR5</i>   | 5                   |
| 2   | <i>C1QA</i>   | <i>CR1</i>    | 4                   |
| 3   | <i>CCL3</i>   | <i>CCR5</i>   | 4                   |
| 4   | <i>ICAM1</i>  | <i>ITGAM</i>  | 4                   |
| 5   | <i>IL15</i>   | <i>IL2RB</i>  | 4                   |
| 6   | <i>PLAU</i>   | <i>ITGA5</i>  | 4                   |
| 7   | <i>VCAM1</i>  | <i>ITGB7</i>  | 4                   |
| 8   | <i>B2M</i>    | <i>LILRB1</i> | 3                   |
| 9   | <i>CCL2</i>   | <i>CCR2</i>   | 3                   |
| 10  | <i>CCL4</i>   | <i>CCR5</i>   | 3                   |
| 11  | <i>CCL8</i>   | <i>CCR5</i>   | 3                   |
| 12  | <i>CSF1</i>   | <i>CSF1R</i>  | 3                   |
| 13  | <i>CXCL12</i> | <i>CD4</i>    | 3                   |
| 14  | <i>FN1</i>    | <i>ITGAV</i>  | 3                   |
| 15  | <i>GNAI2</i>  | <i>FPR1</i>   | 3                   |

Table S6. The top 15 ligand-receptor pairs change most from uncorrelated in normal (the Spearman correlations are between -0.25 and 0.25) to correlated (*Spearman* correlations are higher than 0.5) in cancer tissues



| No. | ligand        | receptor        | Shared cancer types |
|-----|---------------|-----------------|---------------------|
| 1   | <i>CGN</i>    | <i>TGFBR2</i>   | 5                   |
| 2   | <i>CHAD</i>   | <i>ITGB1</i>    | 5                   |
| 3   | <i>SEMA6D</i> | <i>TYROBP</i>   | 5                   |
| 4   | <i>IHH</i>    | <i>BOC</i>      | 4                   |
| 5   | <i>VEGFA</i>  | <i>EPHB2</i>    | 4                   |
| 6   | <i>COL4A1</i> | <i>CD47</i>     | 3                   |
| 7   | <i>FGF2</i>   | <i>FGFR4</i>    | 3                   |
| 8   | <i>FGF2</i>   | <i>SDC1</i>     | 3                   |
| 9   | <i>GNAI2</i>  | <i>IGF1R</i>    | 3                   |
| 10  | <i>GNAS</i>   | <i>ADCY7</i>    | 3                   |
| 11  | <i>INHA</i>   | <i>ACVR1</i>    | 3                   |
| 12  | <i>LAMA1</i>  | <i>NT5E</i>     | 3                   |
| 13  | <i>PIGF</i>   | <i>FLT1</i>     | 3                   |
| 14  | <i>PSAP</i>   | <i>CELSR1</i>   | 3                   |
| 15  | <i>RTN4</i>   | <i>TNFRSF19</i> | 3                   |

Table S7. The ligand-receptor pairs change most from negatively correlated in normal (Spearman correlations are lower than -0.5) to uncorrelated (Spearman correlations are between -0.25 and 0.25) in cancer tissues

| No. | ligand        | receptor      | Shared cancer types |
|-----|---------------|---------------|---------------------|
| 1   | <i>SEMA4G</i> | <i>PLXNB2</i> | 5                   |
| 2   | <i>EFNB3</i>  | <i>RHBDL2</i> | 4                   |
| 3   | <i>FGF2</i>   | <i>NRP1</i>   | 4                   |
| 4   | <i>LIPH</i>   | <i>LPAR2</i>  | 4                   |
| 5   | <i>TGFB3</i>  | <i>TGFBR2</i> | 4                   |
| 6   | <i>ANGPT1</i> | <i>ITGB1</i>  | 3                   |
| 7   | <i>APOE</i>   | <i>CHRNA4</i> | 3                   |
| 8   | <i>BMP6</i>   | <i>BMPR2</i>  | 3                   |
| 9   | <i>CDH1</i>   | <i>ERBB3</i>  | 3                   |
| 10  | <i>CDH1</i>   | <i>PTPRF</i>  | 3                   |
| 11  | <i>COL5A3</i> | <i>SDC3</i>   | 3                   |
| 12  | <i>EFNA3</i>  | <i>EPHA1</i>  | 3                   |
| 13  | <i>EFNA3</i>  | <i>EPHB6</i>  | 3                   |
| 14  | <i>F8</i>     | <i>LRP1</i>   | 3                   |
| 15  | <i>FGF7</i>   | <i>NRP1</i>   | 3                   |

Table S8. The ligand-receptor pairs change most from positively correlated in normal (Spearman correlations are higher than 0.5) to uncorrelated (Spearman correlations are between -0.25 and 0.25) in cancer tissues
